# Supplementary material
Source: publisher figshare collection journal article supplement (https://acs.figshare.com/ndownloader/files/4713661)
Supplement: Supplementary file 1 [file 4713661]

**Supporting Information**

Influence of an extremely negatively charged porphyrin on the reversible binding kinetics of NO to Fe(III) and the subsequent reductive nitrosylation

Joo-Eun Jee, Siegfried Eigler, Norbert Jux, Achim Zahland Rudi van Eldik

(b)

(a)

**Figure S1.** (a) Plot of ln(1/*T*2r) versus 1/*T* for water exchange on (P16-)FeIII(H2O)2 at ambient pressure. Fit of experimental data to the corresponding equation (see text) allows determination of Δ*H*‡ex = 55 ± 3 kJ mol-1 , Δ*S*‡ex = +67 ± 12 J mol-1 K-1, A = (1.8 ± 0.1)  109 , *k*ex = 2.6  106 s-1 (at 20 oC); (b) Plot of *RT*ln(*k*P/*k*0) versus Pressure(MPa) for water exchange on (P16-)FeIII(H2O)2 (at 20 C). A linear fit of the data yields the activation volume Δ*V*‡ex = +6.5 ± 0.3 cm3 mol-1, *k*ex = 2.4  106 s-1 (at 20 C and ambient pressure). Experimental conditions: [(P16-)FeIII] = 20 mM, pH = 6.5 (Mes 0.05 M), *I* = 0.1 M (NaClO4)

**Figure S2.** Eyring plots of ln(*k*/T) versus 1/T for the “on” and “off” reactions for the reversible binding of NO to (P16-)FeIII(OH2)2in the restricted temperature range 4.714.7 °C, taken from Table 3. Experimental conditions: [(P16-)FeIII] = 2.0  105 M, pH 6.5 (0.05 M Mes), det = 430 nm, *I =* 0.1 M (NaClO4)

**Figure S3.** Plot of ln(*k*off/T) versus 1/T for the release of NO from (P16-)FeII(H2O)(NO+) determined with the use of a NO trap. Experimental conditions: Na[RuIII(edta)(H2O)]= 1 mM, det = 430 nm, pH 6.5 (0.05M Mes), *I* = 0.1 M (NaClO4)

**Figure S4.** Plots of ln(*k*obs) versus Pressure (MPa) for the reaction of (P16-)FeIII(OH2)2with NO in the pressure range 10  130 MPa measured by stopped-flow. For the measurement of *k*on as a function of pressure, used [NO] was 0.2 mM. To obtain *k*off as a function of pressure, [RuIII(edta)(H2O)] was used as an NO scavenger in the presence of 0.6 mM NO. Experimental conditions: [(P16-)FeIII] = 2.0  105 M, Na[RuIII(edta)(H2O)] = 1 mM, pH = 6.5 (0.05 M Mes), det = 430 nm, *I =* 0.1 M (NaClO4)

**Figure S5.** Plot of ln(*k*off/T) versus 1/T for the release of NO from (P16-)FeII(OH)(NO+) determined with the NO trapping method. Experimental conditions: Na[RuIII(edta)(H2O)] = 2 mM, pH 12.7 (NaOH, 0.05 M), det = 435 nm, *I* = 0.1 M (NaClO4)

**Figure S6.** Plots of ln(*k*obs) versus Pressure for the reaction of (P16-)FeIII(OH)with nitric oxide in the pressure range 10  130 MPa measured by stopped-flow method. To obtain the value of *k*off, [RuIII(edta)(H2O)]– was used as an efficient scavenger for NO from (P16-)FeII(OH)(NO+). Experimental conditions: [(P16-)FeIII] = 2.0  105 M, pH 12.7 (0.05 M NaOH), *I =* 0.1 M (with NaClO4). For *k*on,[NO] = 0.3 mM, det = 435 nm, temp. = 2.5 °C, and for *k*off, Na[RuIII(edta)(H2O)] = 2 mM, [NO] = 0.6 mM, det = 435 nm, temp. = 2.5 °C

(b)

(a)

**Figure S7**. (a) Temperature dependence for the reductive nitrosylation of (P16-)FeII(H2O)(NO+)by nitrite. (b) Pressure dependence of this reaction. Experimental conditions: (a) [(P16-)FeIII] = 5.0  10-5 M, [NO] = 1 mM, [NO2-] = 16 mM, pH 6.5 (0.05 M Mes). (b) [(P16-)FeIII] = 3.0  10-5 M, [NO] = 0.6 mM, [NO2-] = 16 mM, temp. = 30 oC, det = 431 nm, *I* = 0.1 M (with NaClO4).

**Figure S8**. Hydroxide concentration dependence of the reductive nitrosylation reaction of (P16-)FeII(H2O)(NO+) in the pH range 6.0 – 8.4. Experimental conditions: [(P16-)FeIII] = 1.3  10-5 M, Temp = 25 oC, det = 428 nm, *I* = 0.1 M with NaClO4, *k*OH = 1.0  103 M-1 s-1, *k*H2O = 1.1  10-4 s-1
